# Supplementary material for: Oriented growth of stacking α-cobalt hydroxide salt continuous films and their topotactic-like transformation to oriented mesoporous films of Co3O4 and CoO
Source: Royal Society of Chemistry journal article supplement (doi:10.1039/d2na00594h), 2022-10-18
Supplement: d2na00594h1.pdf [file d2na00594h1.pdf]

## Supplementary Information

### Oriented growth of stacking $\alpha$ -cobalt hydroxide salt continuous films and their topotactic-like transformation to oriented mesoporous films of $\text{Co}_3\text{O}_4$ and $\text{CoO}$

*Tsutomu Shinagawa, \*<sup>a</sup> Natsuko Kotobuki<sup>b</sup> and Atsushi Ohtaka<sup>b</sup>*

<sup>a</sup> Electronic materials research division, Morinomiya center, Osaka Research Institute of Industrial Science and Technology (ORIST), 1-6-50 Morinomiya, Joto, Osaka, 536-8553, Japan.

<sup>b</sup> Department of Applied Chemistry, Faculty of Engineering, Osaka Institute of Technology, 5-16-1 Ohmiya, Asahi, Osaka, 535-8585, Japan.

\*Corresponding author: E-mail: tshina@orist.jp.

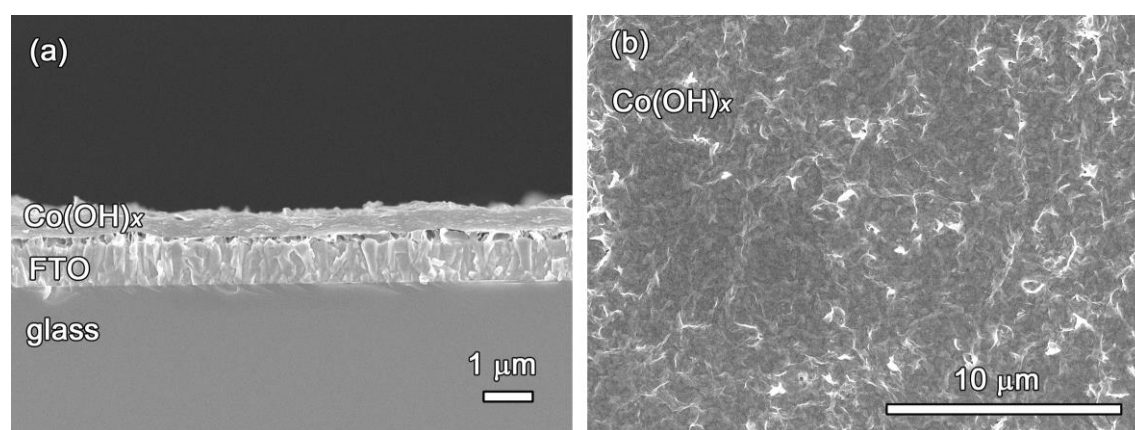

**Figure S1.** (a) cross-sectional and (b) plan-view FESEM images of [001]-oriented layered cobalt hydroxide salt (Co-LHS) films electrodeposited on F-doped  $\text{SnO}_2$  (FTO) substrates in  $\text{Co}(\text{NO}_3)_2$  aqueous solution at room temperature.

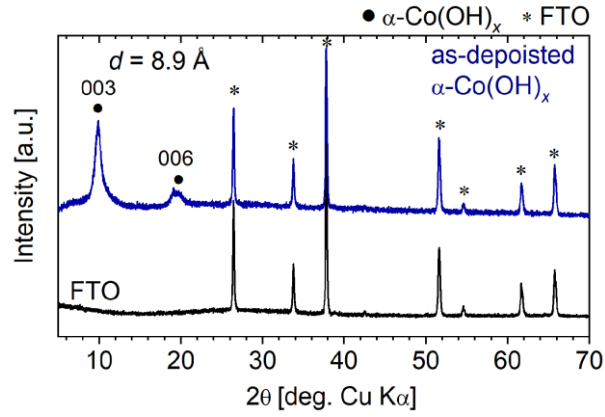

**Figure S2.** X-ray diffraction patterns of [001]-oriented Co-LHS films electrodeposited on FTO substrates in  $\text{Co}(\text{NO}_3)_2$  aqueous solution and dried naturally in air.

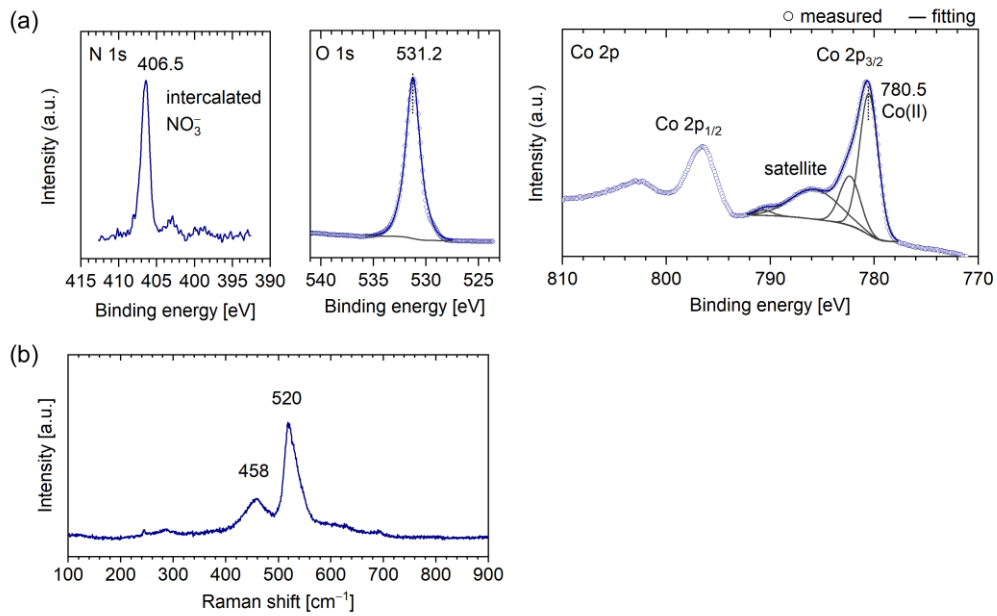

**Figure S3.** (a) N 1s, O 1s and Co 2p XPS spectra and (b) Raman spectrum of [001]-oriented Co-LHS films electrodeposited on FTO substrates in  $\text{Co}(\text{NO}_3)_2$  aqueous solution at room temperature.

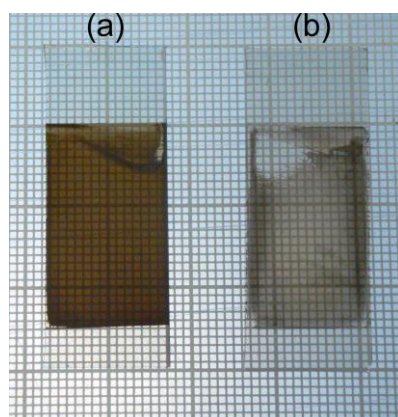

**Figure S4.** Photograph of the obtained samples: (a) [111]-oriented  $\text{Co}_3\text{O}_4$  mesoporous film (MPF) obtained by heating the [001]-oriented Co-LHS film at 550 °C for 1 h in air and (b) [111]-oriented CoO MPF obtained by heating the [001]-oriented Co-LHS film at 500 °C for 1 h under vacuum.

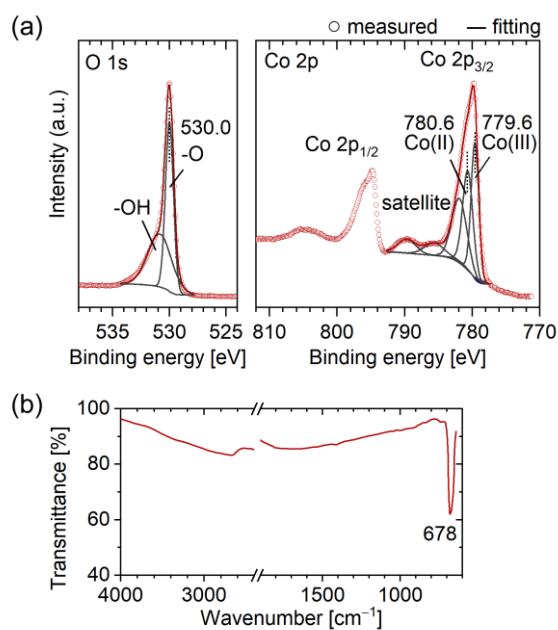

**Figure S5.** (a) O 1s and Co 2p XPS spectra and (b) ATR-FTIR spectrum of the [111]-oriented  $\text{Co}_3\text{O}_4$  mesoporous films (MPFs) obtained by heating [001]-oriented Co-LHS films at 550 °C for 1 h in air.

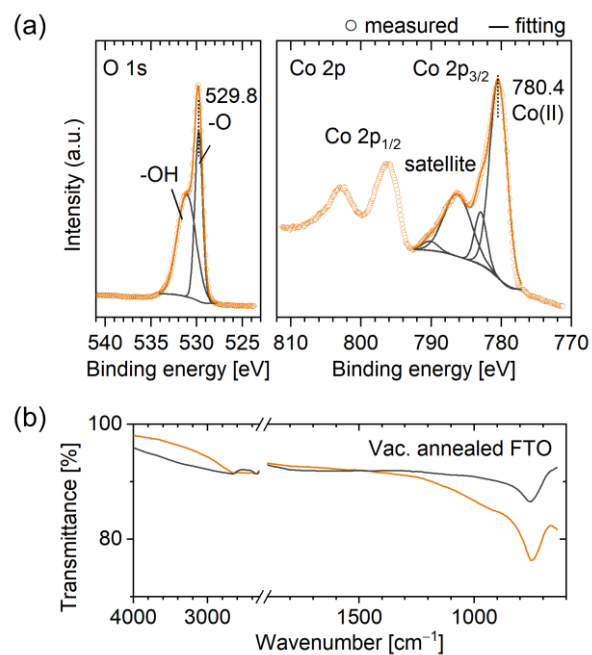

**Figure S6.** (a) O 1s and Co 2p XPS spectra and (b) ATR-FTIR spectrum of the [111]-oriented CoO mesoporous films (MPFs) obtained by heating [001]-oriented Co-LHS films at 500 °C for 1 h under vacuum.
